# Supplementary material
Source: Springer Nature journal article supplement (https://www.springermedizin.de/resource/supplementary/12937_2010_297_MOESM2_ESM.pdf/25654812)

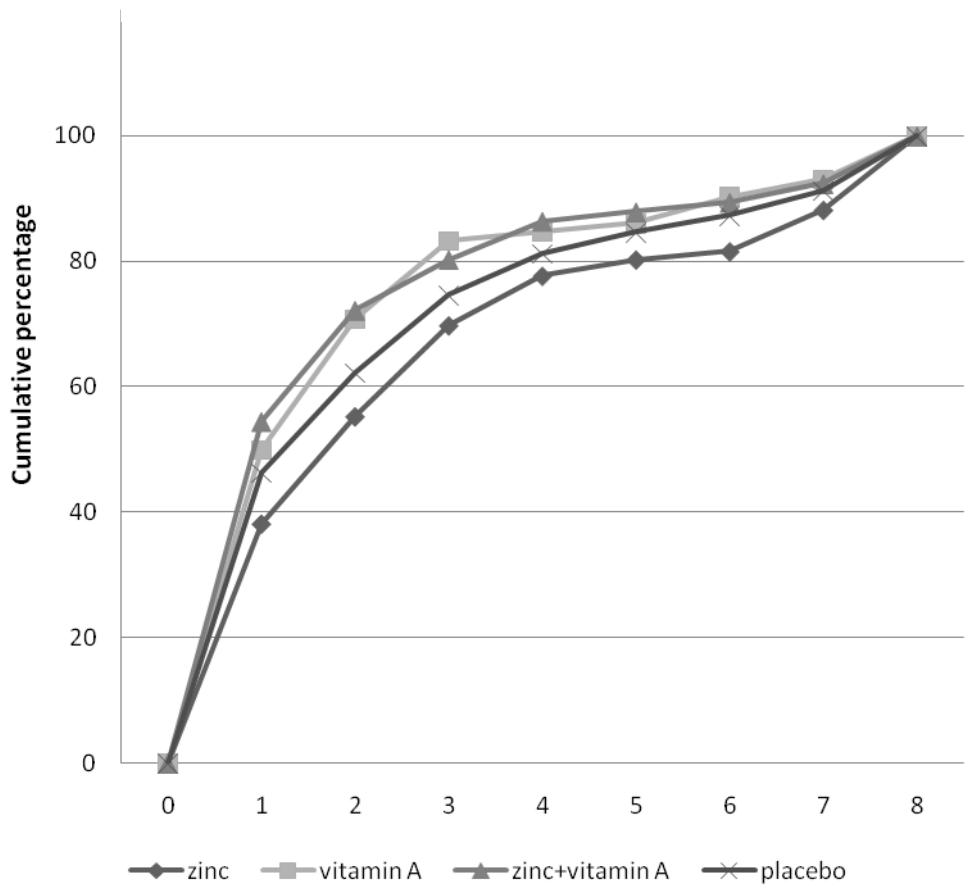

**Time to sputum conversion time (weeks)**

Supplement: MOESM2 [file 25654812]
